# Supplementary material
Source: PubMed Central journal article supplement (PMC3013023)
Supplement: supp_M110.159202_jbc.M110.159202-1.pdf [file supp_M110.159202_jbc.M110.159202-1.pdf]

## Supplementary material

*Suppl. Fig. 1. Effect of cariporide on hNHE1 activity in AP1 cells.*

AP1 cells stably transfected with hNHE1 were loaded with BCECF-AM and  $pH_i$  assessed as described in Experimental Procedures. NHE1 activity was assessed as recovery after an  $NH_4Cl$  prepulse-induced acid load, using fluorescence microscopy and digital image analysis.

*Suppl. Fig. 2. Current measurements after Arg<sup>425</sup>Ala hNHE1 expression in Xenopus oocytes*

*Xenopus* oocytes were either water-injected (A) or injected with Arg<sup>425</sup>Ala hNHE1 (B). The I/V relations were determined under six different conditions: in NaCl buffer, pH 7.4 (white circles), in NaCl buffer, pH 5.8 (gray circles), in NaCl buffer with EIPA, a NHE1 blocker (black triangles), after acidic pre-incubation at pH 5.8 in NaCl buffer pH 7.4 (red triangles), after pre-incubation at pH 5.8 in NaCl buffer, pH 5.8 (blue squares), and after pre-incubation at pH 5.8 in NaCl buffer with EIPA (green squares). The I/V plots are the mean of six oocytes from two different donor frogs. The lines are connections of actual data points.
